# Supplementary material for: Luminescence of a novel Eu(diketonato)–epoxiphenanthroline complex and covalent coupling to peptides via the epoxigroup
Source: Royal Society of Chemistry journal article supplement (doi:10.1039/c2nj40505a), 2012-01-01
Supplement: c2nj40505a.pdf [file c2nj40505a.pdf]

## Electronic Supplementary Information

### Luminescence of a Novel Eu(diketonato) – Epoxiphenanthroline Complex and Covalent Coupling to Peptides via the Epoxigroup

Marina M. Lezhnina, Diana Hofmann, Beatrix Santiago-Schübel, P. Klauth, U. Kynast

#### Supporting information contained in this document:

**Fig S1:** FTIR spectra and principle structures of compounds used in the investigation.

**Fig. S2:** ESI MS of epoxiphenanthroline coupled glutathione.

**Scheme S1:** Fragmentation scheme for epoxiphenanthroline coupled glutathione

**Fig. S3:**  $^1\text{H}$  and  $^{13}\text{C}$  NMR spectra of epoxiphenanthroline coupled glutathione.

**Table S1:** Assignment of  $^1\text{H}$  and  $^{13}\text{C}$  NMR signals epoxiphenanthroline coupled glutathione.

**Fig. S4 :** Comparison of absorption and emission spectra of phen-coupled glutathione, melanostatine and triglycine.

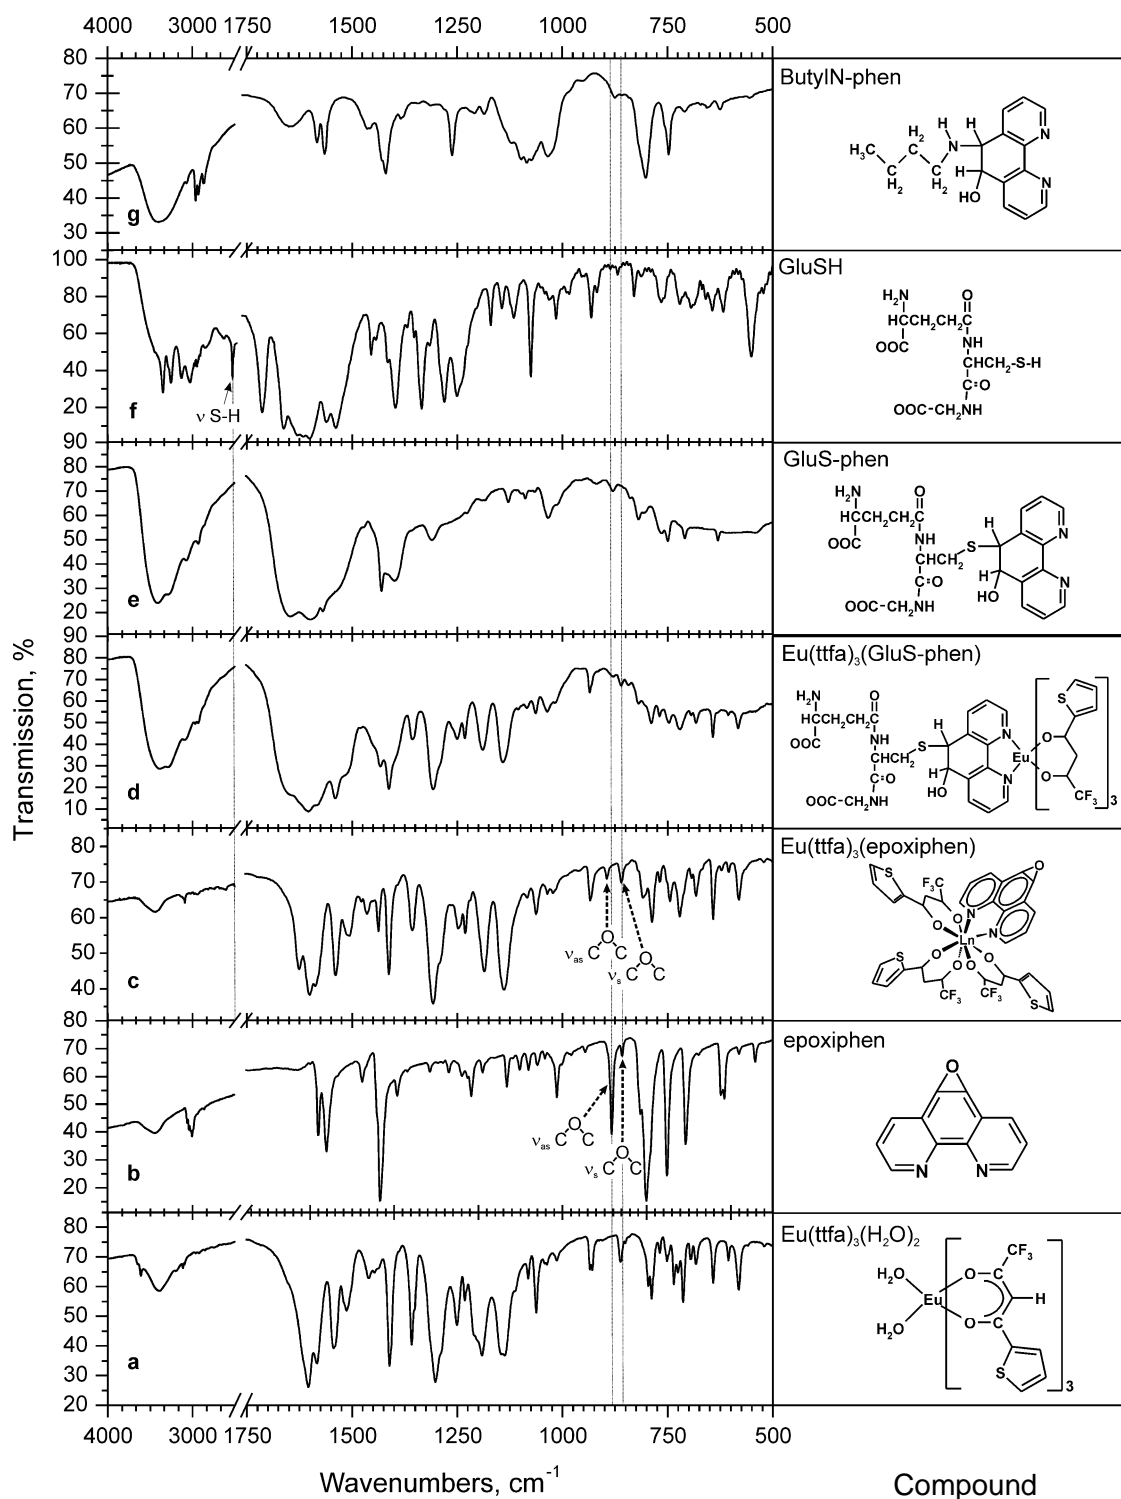

**Fig. S1** FTIR spectra and principle structures of compounds used in the investigation. The disappearance of both,  $\nu(\text{S-H})$  and  $\nu_{\text{as}}(\text{C=O})$  in the reaction of GluSH and epoxiphen evidence linkage via sulfur. The product obtained from a coupling reaction between butyamine and epoxiphen at a pH of 10 (g) shows that coupling with amines is possible in principle also. However, with Mel and Trigly (not shown), no pure materials could be obtained.

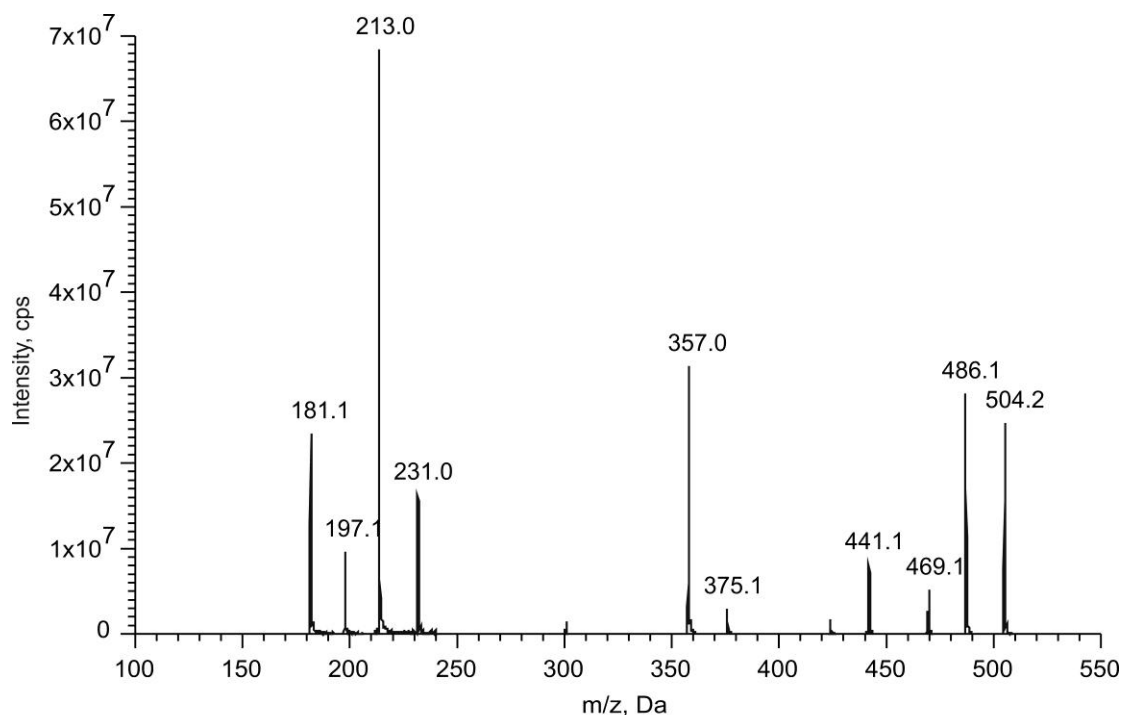

**Fig. S2** ESI MS spectra of epoxiphenanthroline coupled glutathione (“GluS-phen”).

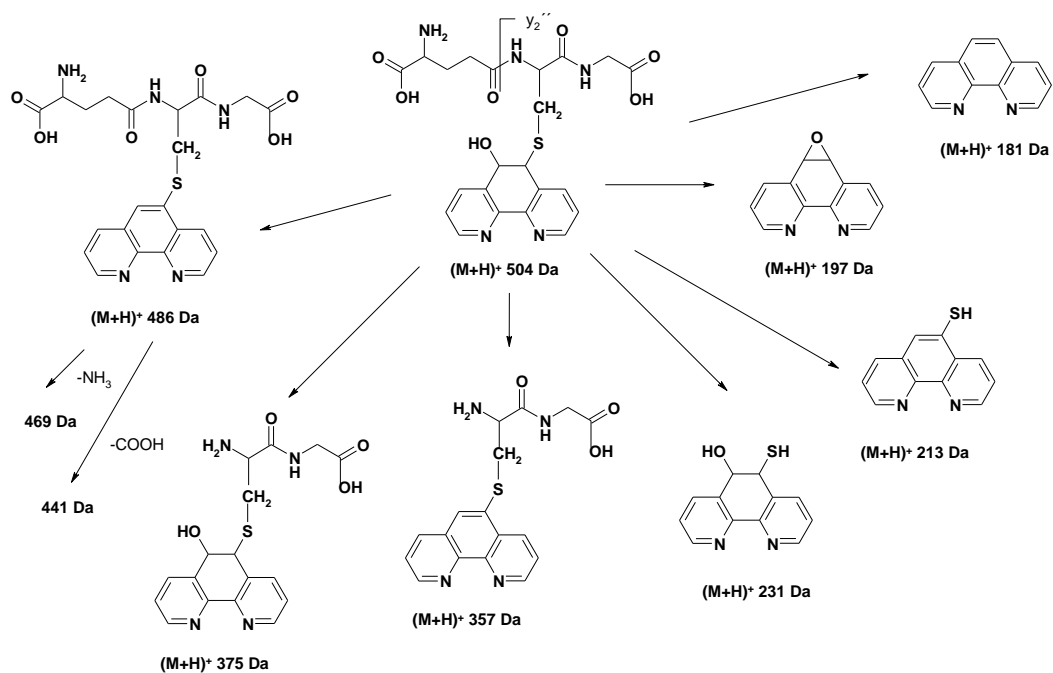

**Scheme S2** MS fragmentation scheme for epoxiphenanthroline coupled glutathione (“GluS-phen”) in ESI MS.

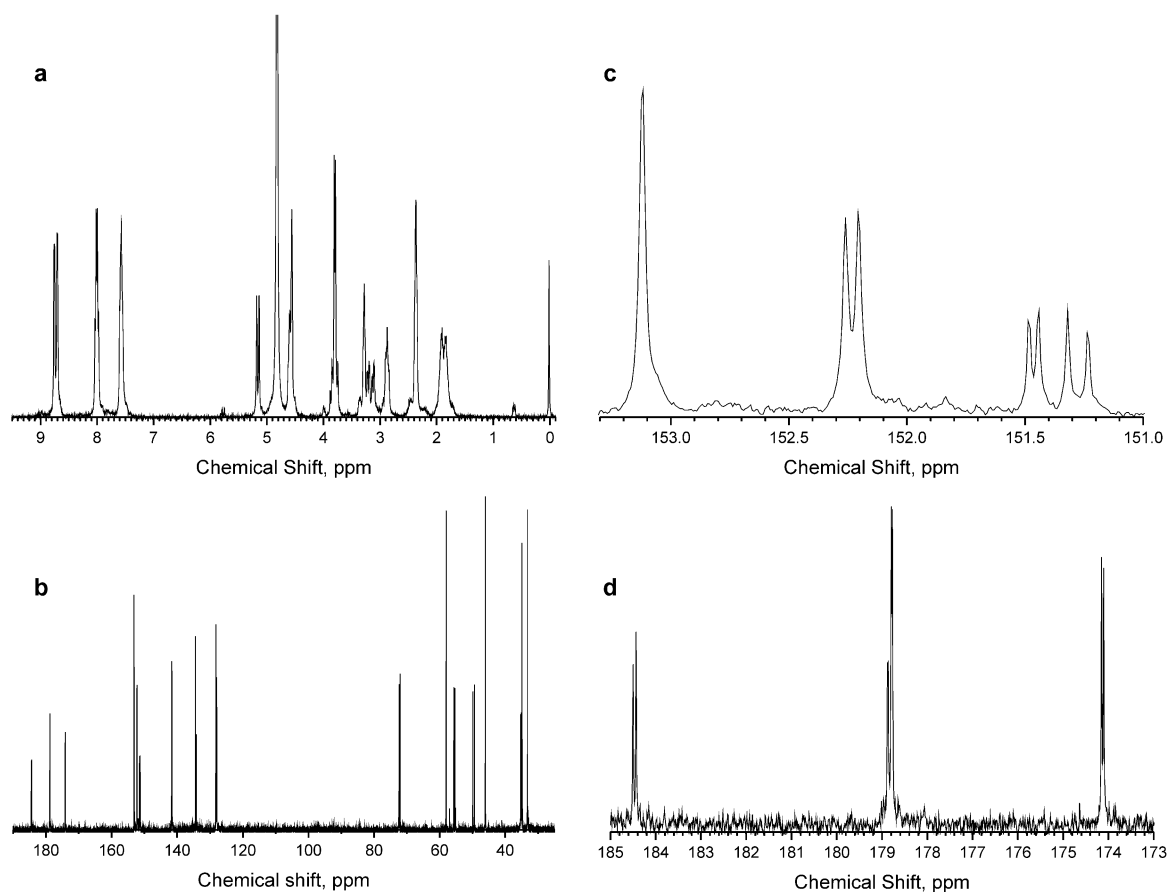

**Fig S3** NMR-spectra of epoxiphenanthroline coupled glutathione (“GluS-phen”): (a)  $^1\text{H}$  NMR; (b), (c), (d)  $^{13}\text{C}$  NMR. (c) and (d) serve to illustrate the subtle splittings indicated in table S1.

**Table S1** Assignment of  $^1\text{H}$  and  $^{13}\text{C}$  NMR signals for GluS-phen (see scheme 1, eqn. 1b)<sup>a</sup>

| Assignment of atoms | Atom                            | Chemical shift, ppm         |                                                           |
|---------------------|---------------------------------|-----------------------------|-----------------------------------------------------------|
|                     |                                 | $^1\text{H}$                | $^{13}\text{C}$ {H}                                       |
|                     | Glu -COO-                       | -                           | 184.22, 184.25 <sup>b</sup>                               |
|                     | Glu $\alpha$ -CH-               | 3.28 (s, 1H)                | 55.1, 55.7 <sup>b</sup>                                   |
|                     | Glu $\beta$ -CH <sub>2</sub> -  | 1.88 (d, 2H)                | 33.2                                                      |
|                     | Glu $\gamma$ -CH <sub>2</sub> - | 2.37 (s, 2H)                | 34.91                                                     |
|                     | Glu -CONH-                      | -                           | 178.77, 178.80 <sup>b</sup>                               |
|                     | Cys $\alpha$ -CH-               | 4.56 (s, 1H)                | 58                                                        |
|                     | Cys $\beta$ -CH <sub>2</sub> -  | 2.87 (s, 1H); 3.17 (d, 1 H) | 35.20, 35.30 <sup>b</sup>                                 |
|                     | Cys -CONH-                      | -                           | 174.11, 174.15 <sup>b</sup>                               |
|                     | Gly $\alpha$ -CH <sub>2</sub> - | 3.80 (s, 2H)                | 46.06                                                     |
|                     | Gly -COO-                       | -                           | 178.9                                                     |
|                     | Phen C(2), C(9)                 | 8.70 (s, 1H), 8.75 (s, 1H)  | 152.18, 152.27 <sup>b</sup> ; 153.1                       |
|                     | Phen C(1a), C(10a)              | -                           | 151.22, 151.23 <sup>b</sup> ; 151.45, 151.48 <sup>b</sup> |
|                     | Phen C(4), C(7)                 | 8.00 (d, 2H)                | 141.55; 141.65                                            |
|                     | Phen C(3), C(8)                 | 7.57 (s, 2H)                | 127.95, 128.00 <sup>b</sup> ; 128.20                      |
|                     | Phen C(4a), Phen C(6a)          | -                           | 134.15, 134.27 <sup>b</sup> ; 134.41                      |
|                     | Phen C(5)-S-                    | 4.60 (d, 1H)                | 49.37, 49.88 <sup>b</sup>                                 |
|                     | Phen C(6)-OH                    | 5.18 (d, 1H)                | 72.07, 72.35 <sup>b</sup>                                 |

<sup>a</sup> for assignment compare references <sup>19,20</sup>. <sup>b</sup> Signals resolving into doublets under higher magnification, see Fig. S3 (c), (d) for examples.

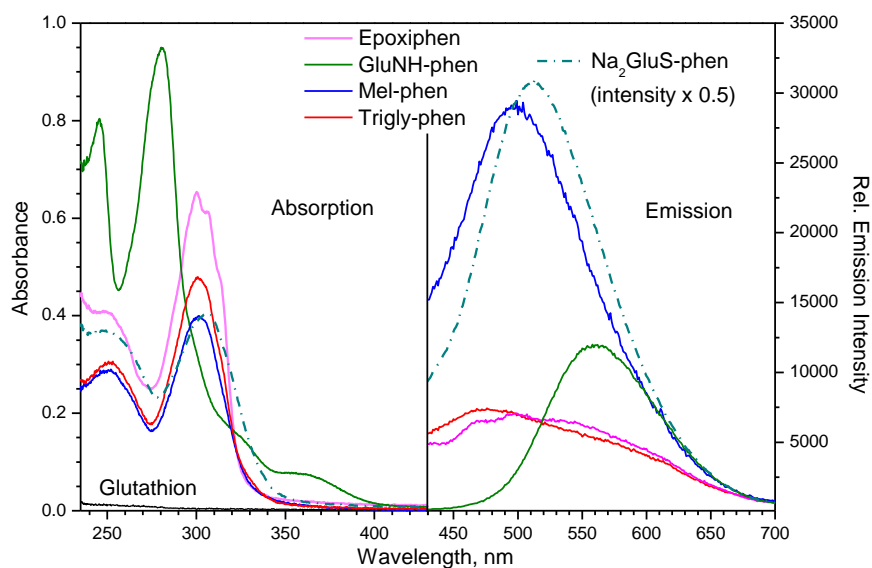

**Fig. S4** Absorption and emission spectra (at  $5 \cdot 10^{-3}$  Mol/L) of epoxiphen coupling products with glutathione at pH = 4, melanostatin and triglycine at pH = 10; for comparison glutathione and epoxiphen coupled to glutathione at pH = 10 (yielding Na<sub>2</sub>GluS-phen) is also included. Note that the emission intensity of Na<sub>2</sub>GluS-phen is approximately three times that of Mel-phen and six times that of Trigly-phen (coupled via  $-NH_2$ , see scheme 1, eqn.1a).
